# Supplementary material for: Improving the performance of porous nickel foam for water oxidation using hydrothermally prepared Ni and Fe metal oxides
Source: Royal Society of Chemistry journal article supplement (doi:10.1039/c6se00032k), 2016-12-09
Supplement: c6se00032k1.pdf [file c6se00032k1.pdf]

## Supporting Information

### Improving the Performance of Porous Nickel Foam for Water Oxidation using Hydrothermally Prepared Ni and Fe Metal Oxides

Michelle P. Browne<sup>1,2\*</sup>, Joana M. Vasconcelos<sup>1,2</sup>, João Coelho<sup>1,2</sup>, Maria O'Brien<sup>1,2</sup>, Aurelie A. Rovetta<sup>1,2</sup>, Eoin K. McCarthy<sup>2</sup>, Hugo Nolan<sup>1,2</sup>, Georg S. Dusberg<sup>1,2</sup>, Valeria Nicolosi<sup>1,2</sup>, Paula E. Colavita<sup>1,2</sup> and Michael E.G. Lyons<sup>1,2</sup>.

<sup>1</sup>School of Chemistry, Trinity College Dublin, College Green, Dublin 2.

<sup>2</sup>Centre for Research on Adaptive Nanostructures and Nanodevices (CRANN) and Advanced Materials and BioEngineering Research (AMBER) Centre, Trinity College Dublin, Dublin 2, Ireland.

**Table S1: TEM Size parameters for Fe, Ni/Fe and Ni oxide particles.**

| Material | Size range(nm) | Average Size (nm) | Standard Deviation (nm) |
|----------|----------------|-------------------|-------------------------|
| Fe       | 35-47          | 41                | 6                       |
| NiFe     | 20-280         | 200               | 108                     |
| Ni       | 80-120         | 100               | 20                      |

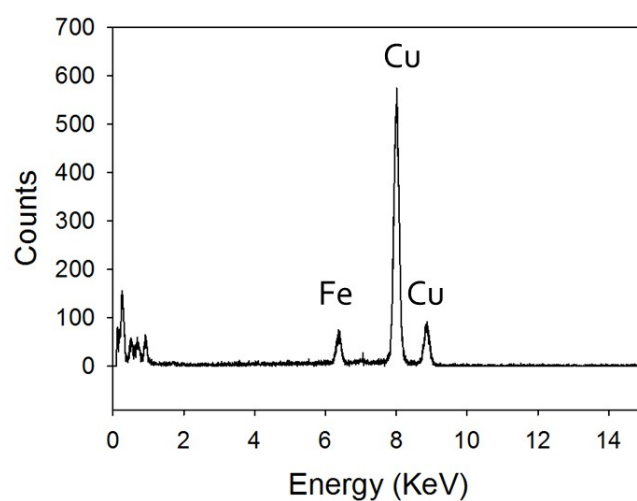

**Figure S1. EDX of the Fe oxide hydrothermal powder (Cu is from the carbon/copper grids)**

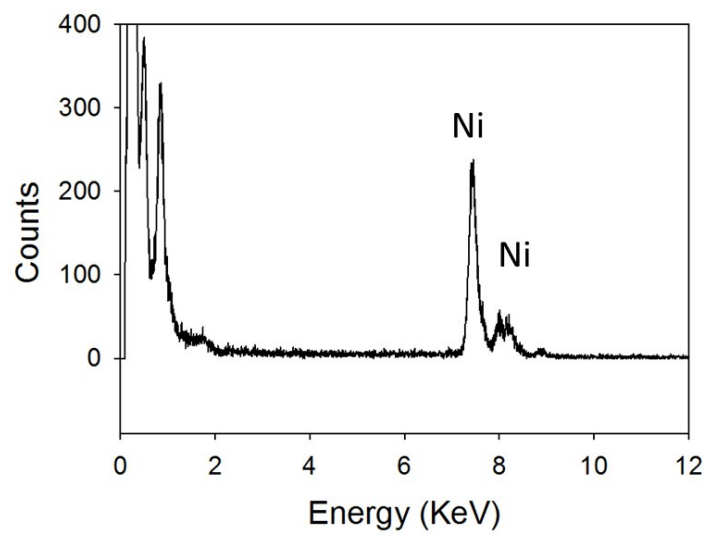

**Figure S2. EDX of the Ni oxide hydrothermal powder**

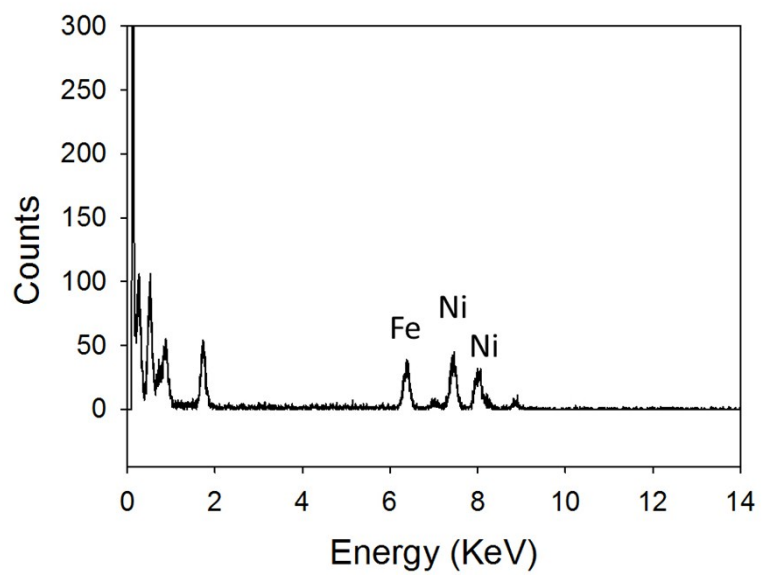

**Figure S3. EDX of the Ni/Fe oxide hydrothermal powder**

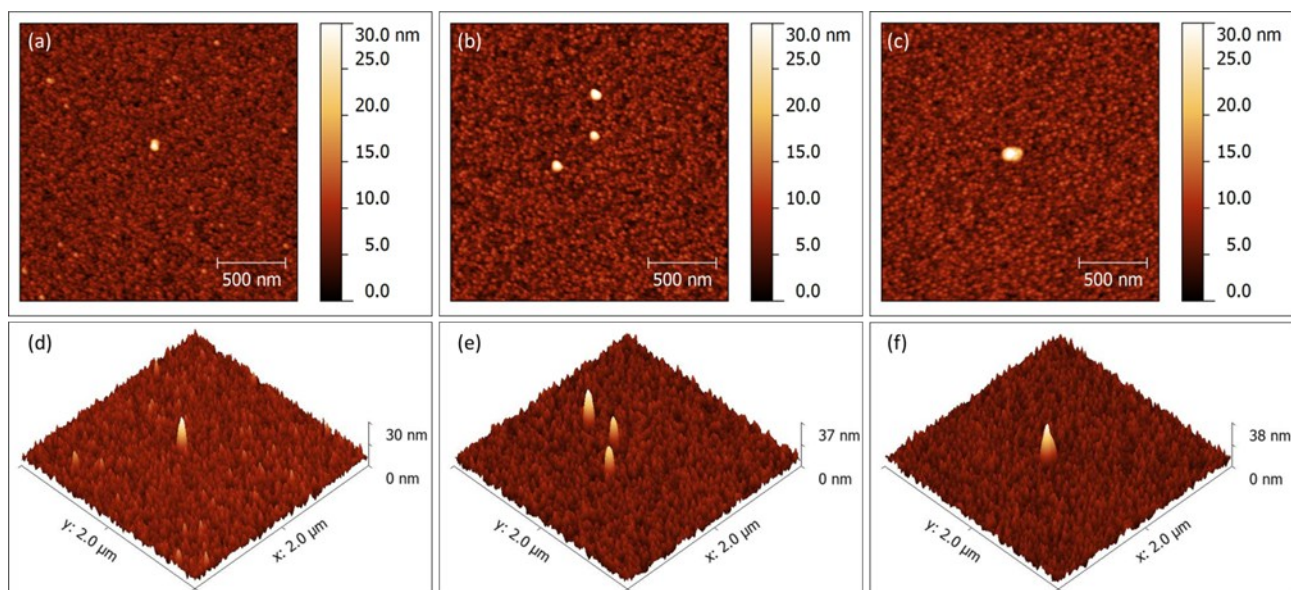

Figure S4 - AFM topographic image and respective 3D profile of (a)(d) Fe, (b)(e) Ni/Fe and (c)(f) Ni salts deposited on a Ti substrate.

Table S2: AFM height parameters for Fe, Ni/Fe and Ni oxide particles.

| Material | Average Height Profile (nm) |
|----------|-----------------------------|
| Fe       | $3.2 \pm 0.6$               |
| Ni/Fe    | $21 \pm 3$                  |
| Ni       | $20.8 \pm 5.3$              |

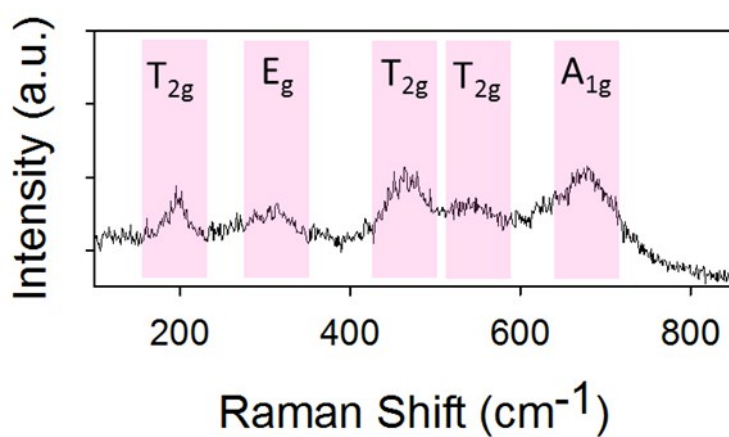

Figure S5. Raman Spectroscopy of the hydrothermal Ni/Fe oxide.

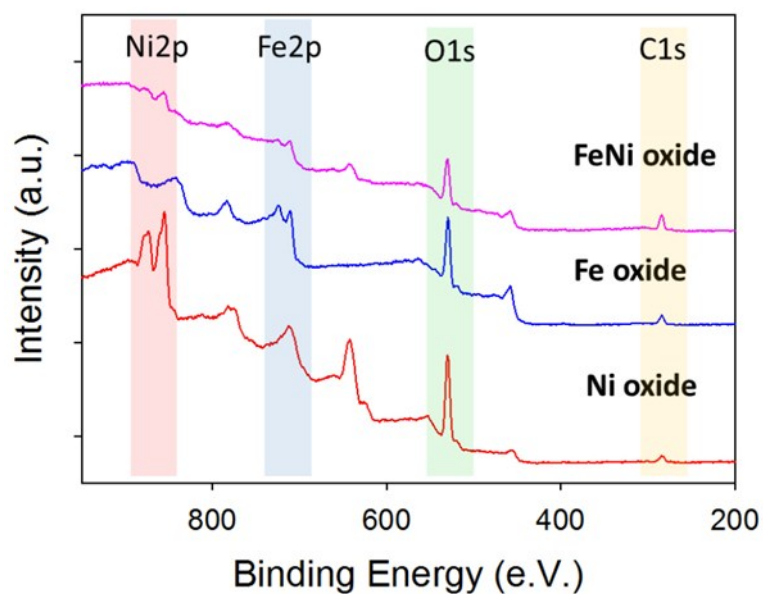

Figure S6. XPS survey spectra for the hydrothermal Fe, Ni/Fe and Ni.

Table S3. Oxidation state surface concentrations for the hydrothermal materials calculated from high resolution XPS prior to OER.

| Material | Fe <sub>2</sub> O <sub>3</sub> (%) | Fe <sub>3</sub> O <sub>4</sub> (%) | NiFe <sub>2</sub> O <sub>4</sub> (%) | Ni(OH) <sub>2</sub> (%) | NiOOH(%) | Relevant metal(%) |
|----------|------------------------------------|------------------------------------|--------------------------------------|-------------------------|----------|-------------------|
| Fe       | 63                                 | 36.90                              | -                                    | -                       | -        | 0.10              |
| NiFe     | -                                  | -                                  | 100                                  | -                       | -        |                   |
| Ni       | -                                  | -                                  | -                                    | 97                      | -        | 3                 |

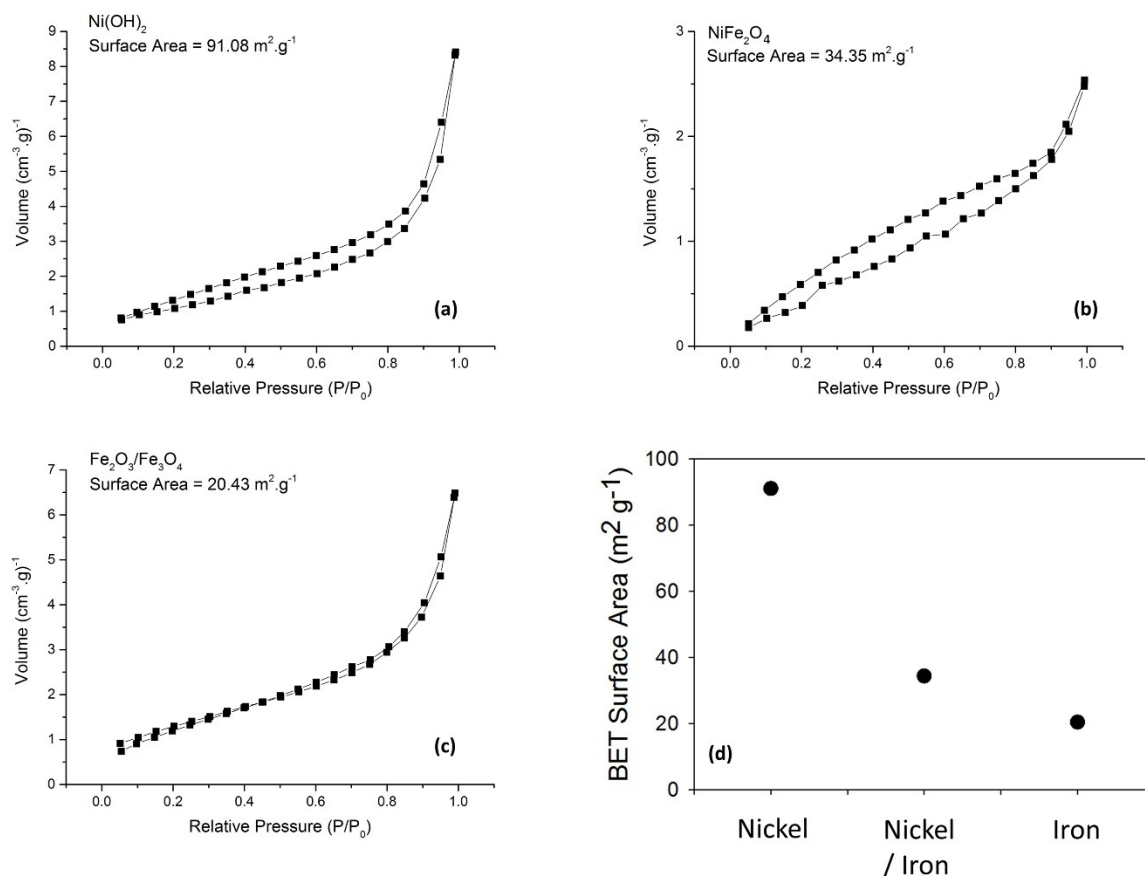

**Figure S7. BET measurements of (a)  $\text{Ni(OH)}_2$  (b)  $\text{NiFe}_2\text{O}_4$  (c)  $\text{Fe}_2\text{O}_3/\text{Fe}_3\text{O}_4$  and (d) BET surface areas of all three hydrothermal powders**

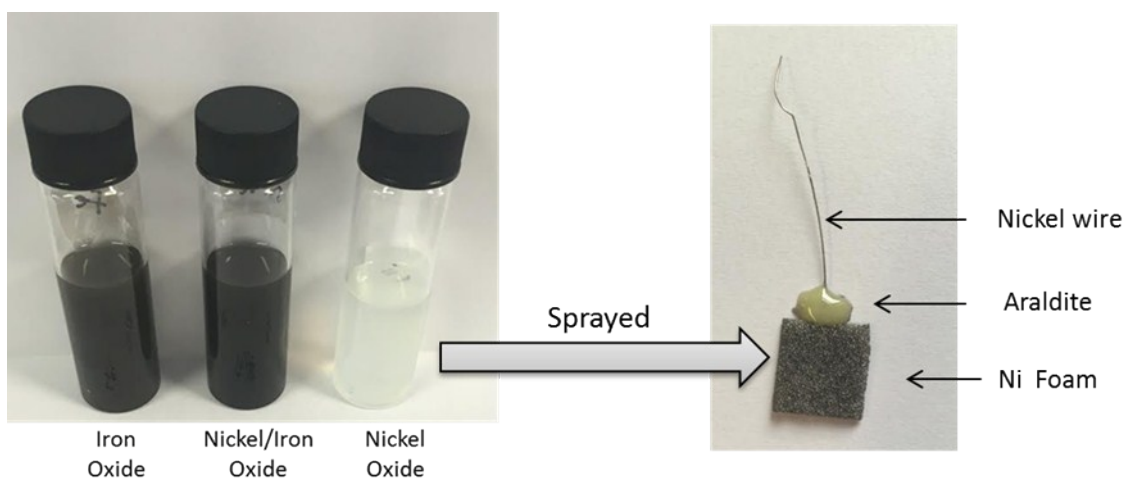

**Figure S8. Preparation of the synthesised hydrothermal powders onto the Ni Foams.**

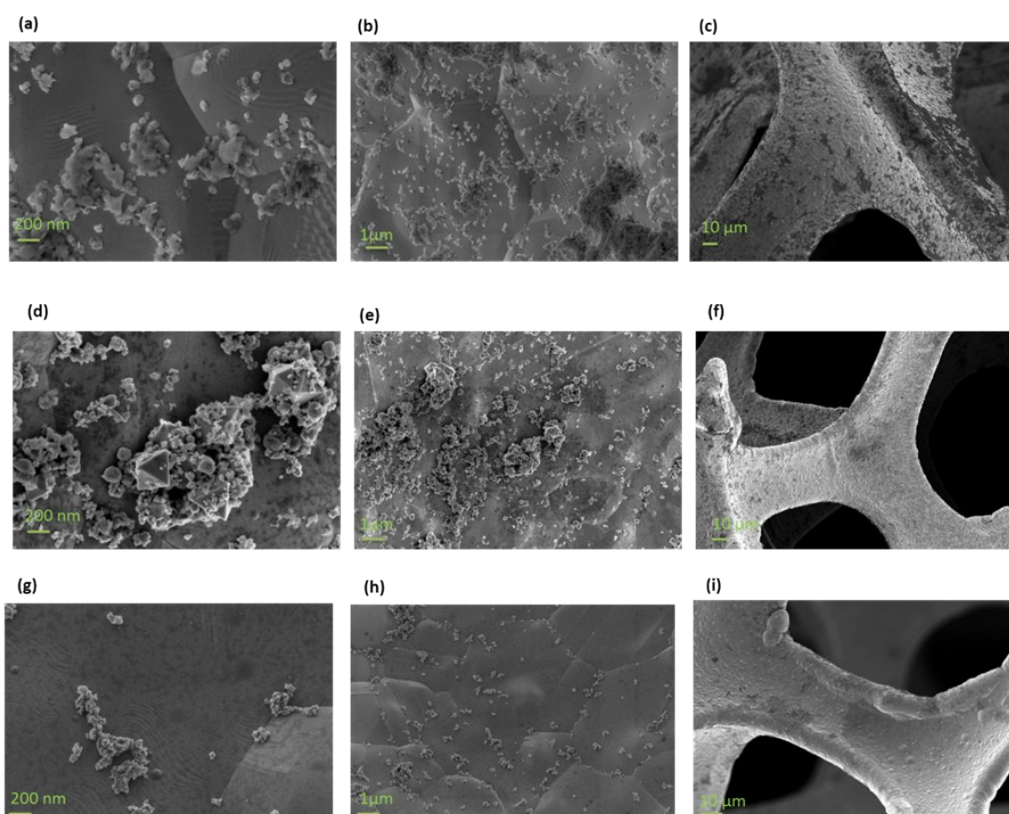

**Figure S9. SEM images of Ni foam substrates loaded with oxides of (a) Ni (scale bar = 200nm), (b) Ni (scale bar = 1  $\mu\text{m}$ ), (c) Ni (scale bar = 10  $\mu\text{m}$ ), (d) Ni/Fe (scale bar = 200 nm), (e) Ni/Fe (scale bar = 1  $\mu\text{m}$ ), (f) Ni/Fe (scale bar = 10  $\mu\text{m}$ ), (g) Fe (scale bar = 200 nm), (h) Fe (scale bar = 1  $\mu\text{m}$ ) and (i) Fe (scale bar = 10  $\mu\text{m}$ ).**

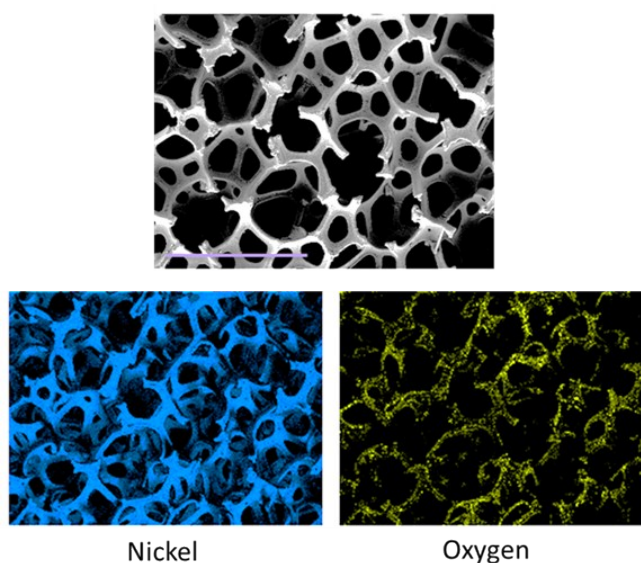

**Figure S10. (a) SEM image of Ni foam decorated with Ni oxide particles. EDX maps of (b) Ni K $\alpha$  and (c) O K $\alpha$  peak intensities corresponding to the image in (a).**

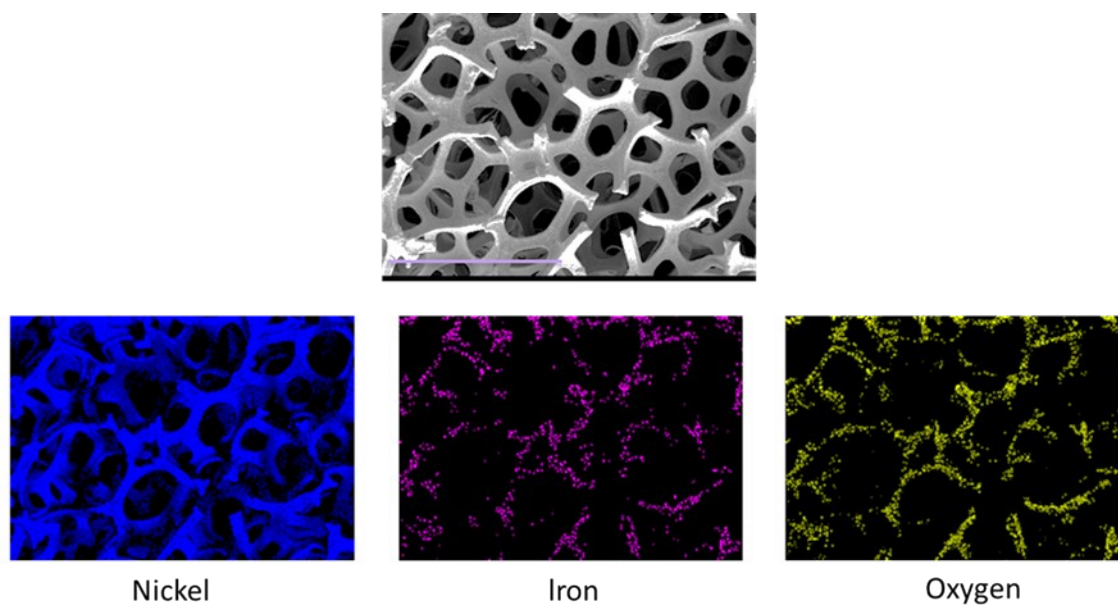

**Figure S11. (a) SEM image of Ni foam decorated with Ni/Fe oxide particles. EDX maps of (b) Ni K $\alpha$ , (c) Fe K $\alpha$  and (d) O K $\alpha$  peak intensities corresponding to the image in (a).**

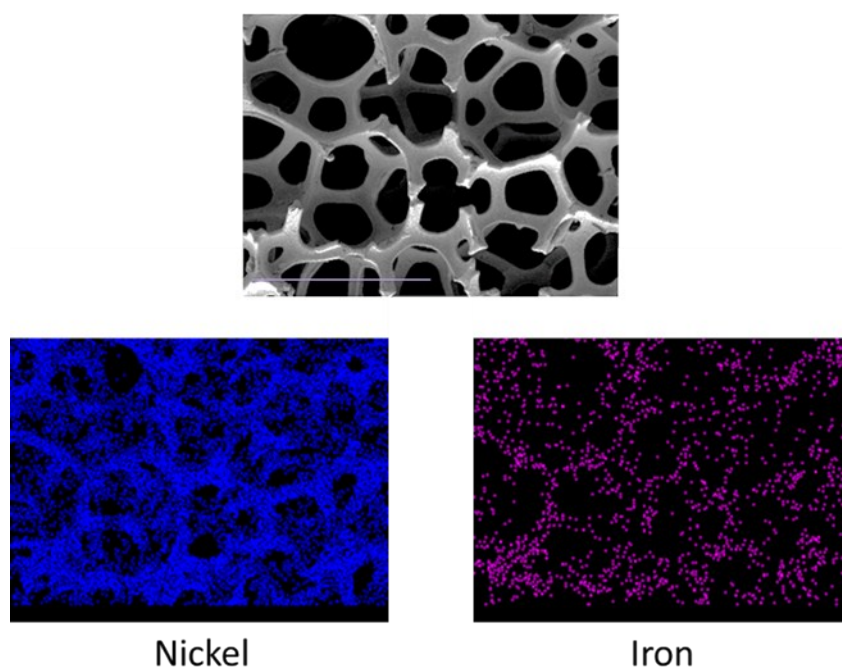

**Figure S12. (a) SEM image of Fe oxide (b) Ni K $\alpha$  EDX map of Fe oxide SEM image and (c) Fe K $\alpha$  EDX map of Fe oxide SEM image.**

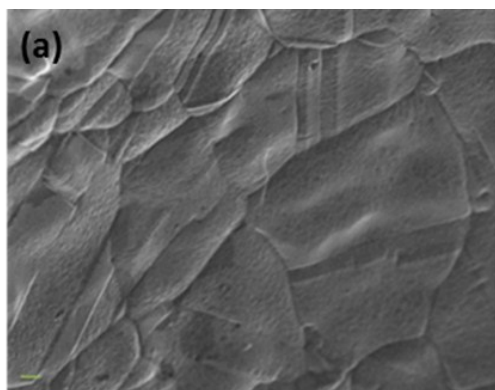

**Figure S13.** SEM images of the bare Ni foams. Scale bar corresponds to 1  $\mu\text{m}$  (left).

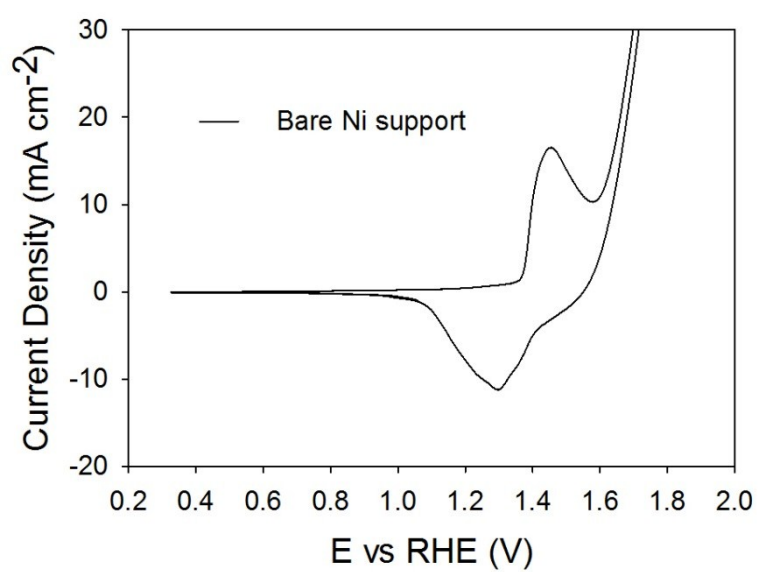

**Figure S14.** Typical Cyclic Voltammetric response recorded in 1M NaOH at a sweep rate of 40  $\text{mV s}^{-1}$  for bare Ni foam.

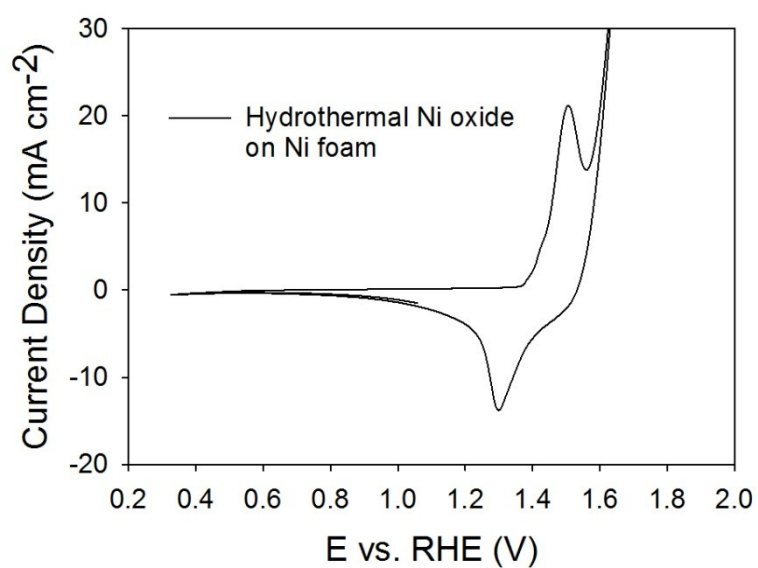

**Figure S15.** Typical Cyclic Voltammetric response recorded in 1M NaOH at a sweep rate of  $40 \text{ mV s}^{-1}$  for a modified Ni foam electrode with hydrothermal Ni oxide powder.

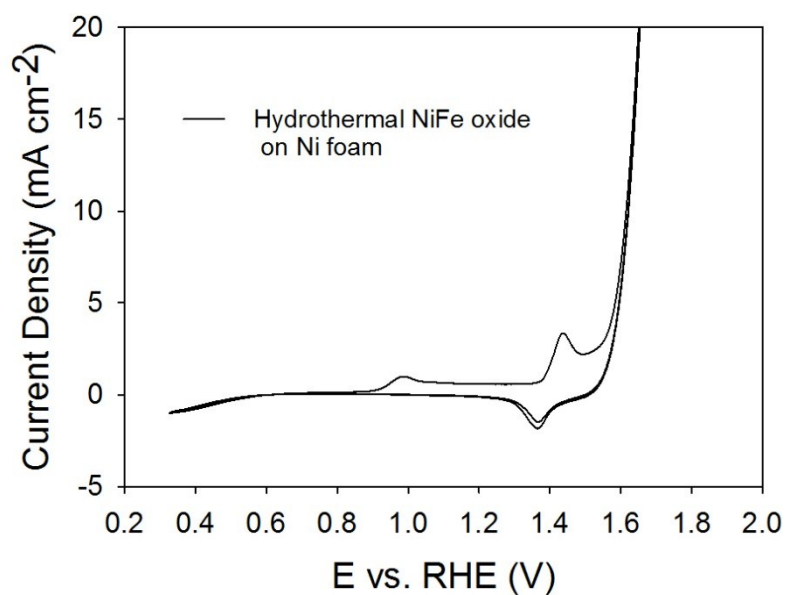

**Figure S16.** Typical Cyclic Voltammetric response recorded in 1M NaOH at a sweep rate of  $40 \text{ mV s}^{-1}$  for a modified Ni foam electrode with hydrothermal Ni/Fe oxide powder.

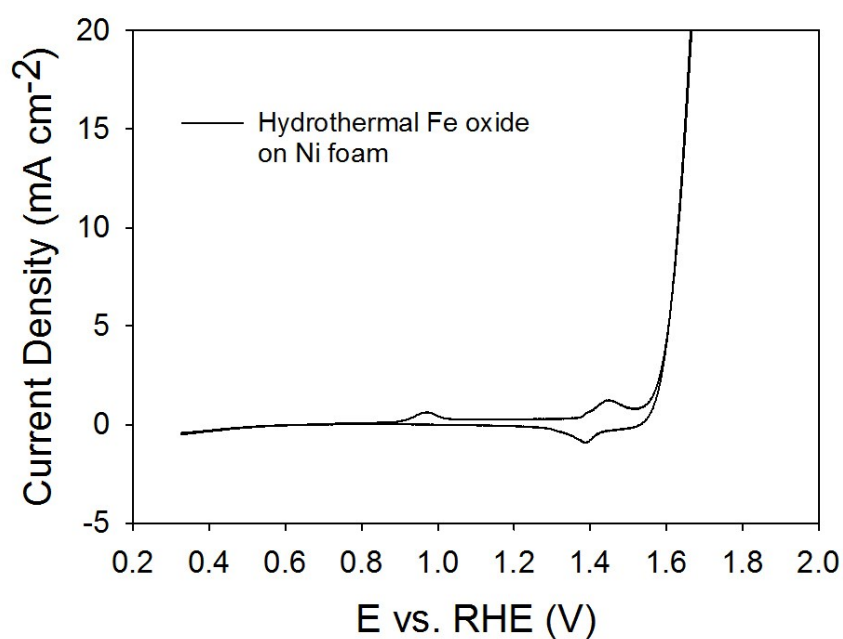

**Figure S17.** Typical Cyclic Voltammetric response recorded in 1M NaOH at a sweep rate of  $40 \text{ mV s}^{-1}$  for a modified Ni foam electrode with hydrothermal Fe oxide powder.

**Table S4.** Oxidation state surface concentrations for the hydrothermal materials calculated from high resolution XPS after OER.

| Material | $\text{Fe}_2\text{O}_3$ (%) | $\text{FeOOH}$ (%) | $\text{NiFe}_2\text{O}_4$ (%) | $\text{Ni}(\text{OH})_2$ (%) | $\text{NiOOH}$ (%) |
|----------|-----------------------------|--------------------|-------------------------------|------------------------------|--------------------|
| Fe       | 100                         | -                  | -                             | -                            | -                  |
| NiFe     | 18                          | 72.5               | 9.5                           | -                            | -                  |
| Ni       | -                           | -                  | -                             | -                            | 100                |

**Table S5.** Literature Comparison with other hydrothermally prepared Ni, NiFe and Fe oxides

| Material oxide                  | Overpotential at $10 \text{ mA cm}^{-2}$ | Tafel | TOF   | Ref          |
|---------------------------------|------------------------------------------|-------|-------|--------------|
| Ni (This work)                  | 0.36                                     | 75    | 0.283 | This work    |
| NiFe (This work)                | 0.377                                    | 80    | 0.120 | This work    |
| Fe (This work)                  | 0.39                                     | 65    | 0.1   | This work    |
| $\beta\text{-Ni}(\text{OH})_2$  | 0.59                                     | n/a   | n/a   | <sup>1</sup> |
| $\alpha\text{-Ni}(\text{OH})_2$ | 0.42                                     | 47    | n/a   | <sup>2</sup> |
| $\text{NiFe}_2\text{O}_4$       | n/a                                      | 96    | n/a   | <sup>2</sup> |
| $\text{FeO}_x$                  | 0.44                                     | 93    | n/a   | <sup>3</sup> |

## References

1. X. Zhou, Z. Xia, Z. Zhang, Y. Ma and Y. Qu, *Journal of Materials Chemistry A*, 2014, **2**, 11799-11806.
2. H. Chen, J. Yan, H. Wu, Y. Zhang and S. Liu, *J. Power Sources*, 2016, **324**, 499-508.
3. F. Yan, C. Zhu, S. Wang, Y. Zhao, X. Zhang, C. Li and Y. Chen, *Journal of Materials Chemistry A*, 2016, **4**, 6048-6055.
